# Supplementary material for: ChronQC: a quality control monitoring system for clinical next generation sequencing
Source: Oxford University Press journal article supplement (doi:10.1093/bioinformatics/btx843), 2017-12-27
Supplement: bioinformatics_34_10_1799_s1.docx [file bioinformatics_34_10_1799_s1.docx]

ChronQC: A Quality Control Monitoring System for Clinical Next Generation Sequencing

Nilesh R. Tawari*, Justine Jia Wen Seow, Dharuman Perumal, Jack L. Ow, Shimin Ang, Arun G. Devasia, Pauline C. Ng*

Computational and Systems Biology, Genome Institute of Singapore, 60 Biopolis Street, Genome, #02-01, Singapore 138672

*To whom correspondence should be addressed.

**Supplementary Table 1:** ChronQC chart types. Examples of these chart types can be seen at <https://nilesh-tawari.github.io/chronqc>

| Chart type | Description | Use case |
| --- | --- | --- |
| Time series plot with mean and standard deviation | A time series plot of numerical data with historical runs. Rolling mean and ±2 standard deviations are shown. | Can be used to track metrics such as total number of reads. The window to compute rolling mean and ±2 standard deviations can be set to either a specified duration (e.g. runs in the past year) or number of historical runs (e.g. past 10 runs). |
| Time series plot with an absolute threshold | A time series plot of numerical data with user-defined lower and upper thresholds. | Can be used to track metrics such as depth of coverage, Ti/Tv ratio, and GC content per sample. Lower and upper thresholds can be based on empirical values. |
| Time series plot with percentage of samples above a threshold | A time series plot representing percentage of numerical data above a user-defined threshold. | Can be used to track metrics such as percentage of samples in a run that exceed a certain threshold. |
| Time series plot with percentage of samples with a category label | A time series plot of categorical data representing % of samples in a run with y-value equal to a category label. | Can be used to track percentage of samples in a run with a certain label. E.g. % of samples labeled “PASS”. |
| Time series box-and-whisker plot of numerical data | A monthly time series box-and-whisker plot of numerical data. | Can be used to track number of single nucleotide variants (SNVs) and indels observed for each month. |
| Time series with stacked bar plot | A stacked bar plot of categorical data summarized for each month. | Can be used to track number of observed mutations in clinically actionable genes per month. |
| Time series with bar and line plot | A bar and line representation of categorical data. | Can be used to track number of observed mutations in clinically actionable genes per month. |

**Supplementary Table 2:** NGS tools with their corresponding QC metrics and their chart types implemented in ChronQC’s default configuration.

| Tool name | QC metrics | Chart type implemented in default JSON (config file) |
| --- | --- | --- |
| FastQC | FastQC_percent_gc | time_series_with_mean_and_stdev |
| FastQC_total_sequences | time_series_with_mean_and_stdev |
| FastQC_percent_duplicates | time_series_with_mean_and_stdev |
| FastQC_percent_fails | time_series_with_mean_and_stdev |
| FastQC_avg_sequence_length | time_series_with_mean_and_stdev |
| QualiMap | QualiMap_30_x_pc | time_series_with_mean_and_stdev |
| QualiMap_percentage_aligned | time_series_with_mean_and_stdev |
| QualiMap_avg_gc | time_series_with_mean_and_stdev (if FastQC_percent_gc is present this plot is omitted to avoid duplication) |
| QualiMap_mapped_reads | time_series_with_mean_and_stdev |
| QualiMap_median_coverage | time_series_with_percentage_of_samples_above_threshold (Default threshold 30) and time_series_with_absolute_threshold (Default threshold 30) |
| QualiMap_total_reads | time_series_with_mean_and_stdev (if FastQC_total_sequences is present this plot is omitted to avoid duplication) |
| Bamtools | Bamtools_mapped_reads_pct | time_series_with_mean_and_stdev (if QualiMap_percentage_aligned is present this plot is omitted to avoid duplication) |
| Samtools | SamtoolsFlagstat_mapped_passed | time_series_with_mean_and_stdev (if QualiMap_mapped_reads is present this plot is omitted to avoid duplication) |
| Bcftools | BcftoolsStats_number_of_MNPs | time_series_with_box_whisker_plot |
| BcftoolsStats_number_of_SNPs | time_series_with_box_whisker_plot |
| Bcftools_Stats_number_of_indels | time_series_with_box_whisker_plot |
| BcftoolsStats_number_of_records | time_series_with_box_whisker_plot |
| BcftoolsStats_tstv | time_series_with_mean_and_stdev |
| Peddy | Peddy_error | time_series_with_percentage_category (Default category: True) |
| Any other tool | Columns with numeric data | time_series_with_mean_and_stdev |

References

Barnett, D. (2011). BamTools: a C++ API and toolkit for analyzing and managing BAM files. *Bioinformatics*, **27**, 1691-1692.

Brown, J. et al. (2017) FQC Dashboard: integrates FastQC results into a web-based, interactive, and extensible FASTQ quality control tool. *Bioinformatics*, **33**, 3137–3139.

Danecek, P. et al. (2017). BCFtools/csq: haplotype-aware variant consequences. *Bioinformatics*, **33**, 2037-2039.

Li, H. (2011). A statistical framework for SNP calling, mutation discovery, association mapping and population genetical parameter estimation from sequencing data. *Bioinformatics*, **27**, 2987-2993.

Li, H. et al. (2009). The Sequence Alignment/Map format and SAMtools. *Bioinformatics*, **25**, 2078-2079.

Narasimhan, V. et al. (2016). BCFtools/RoH: a hidden Markov model approach for detecting autozygosity from next-generation sequencing data. *Bioinformatics*, **32**, 1749-1751.

Pedersen, B. et al. (2017). Who’s Who? Detecting and Resolving Sample Anomalies in Human DNA Sequencing Studies with Peddy. *Am J Hum Genet*, **100**, 406-413.
